# Supplementary material for: Synthesis and the impact of hydroxyapatite nanoparticles on the viability and activity of rhizobacteria
Source: publisher site journal article supplement (doi:10.3762/bjnano.16.17), 2025-02-18
Supplement: Additional file 1 [file 2190-4286-16-17-S1.pdf]

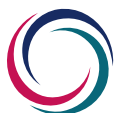

## Supporting Information

for

### **Synthesis and the impact of hydroxyapatite nanoparticles on the viability and activity of rhizobacteria**

Bedah Rupaedah, Indrika Novella, Atiek Rostika Noviyanti, Diana Rakhmawaty Eddy, Anna Safarrida, Abdul Hapid, Zhafira Amila Haqqa, Suryana Suryana, Irwan Kurnia and Fathiyah Inayatirrahmi

*Beilstein J. Nanotechnol.* **2025**, *16*, 216–228. doi:10.3762/bjnano.16.17

### **Activity tests of Pd and Tb rhizobacteria**

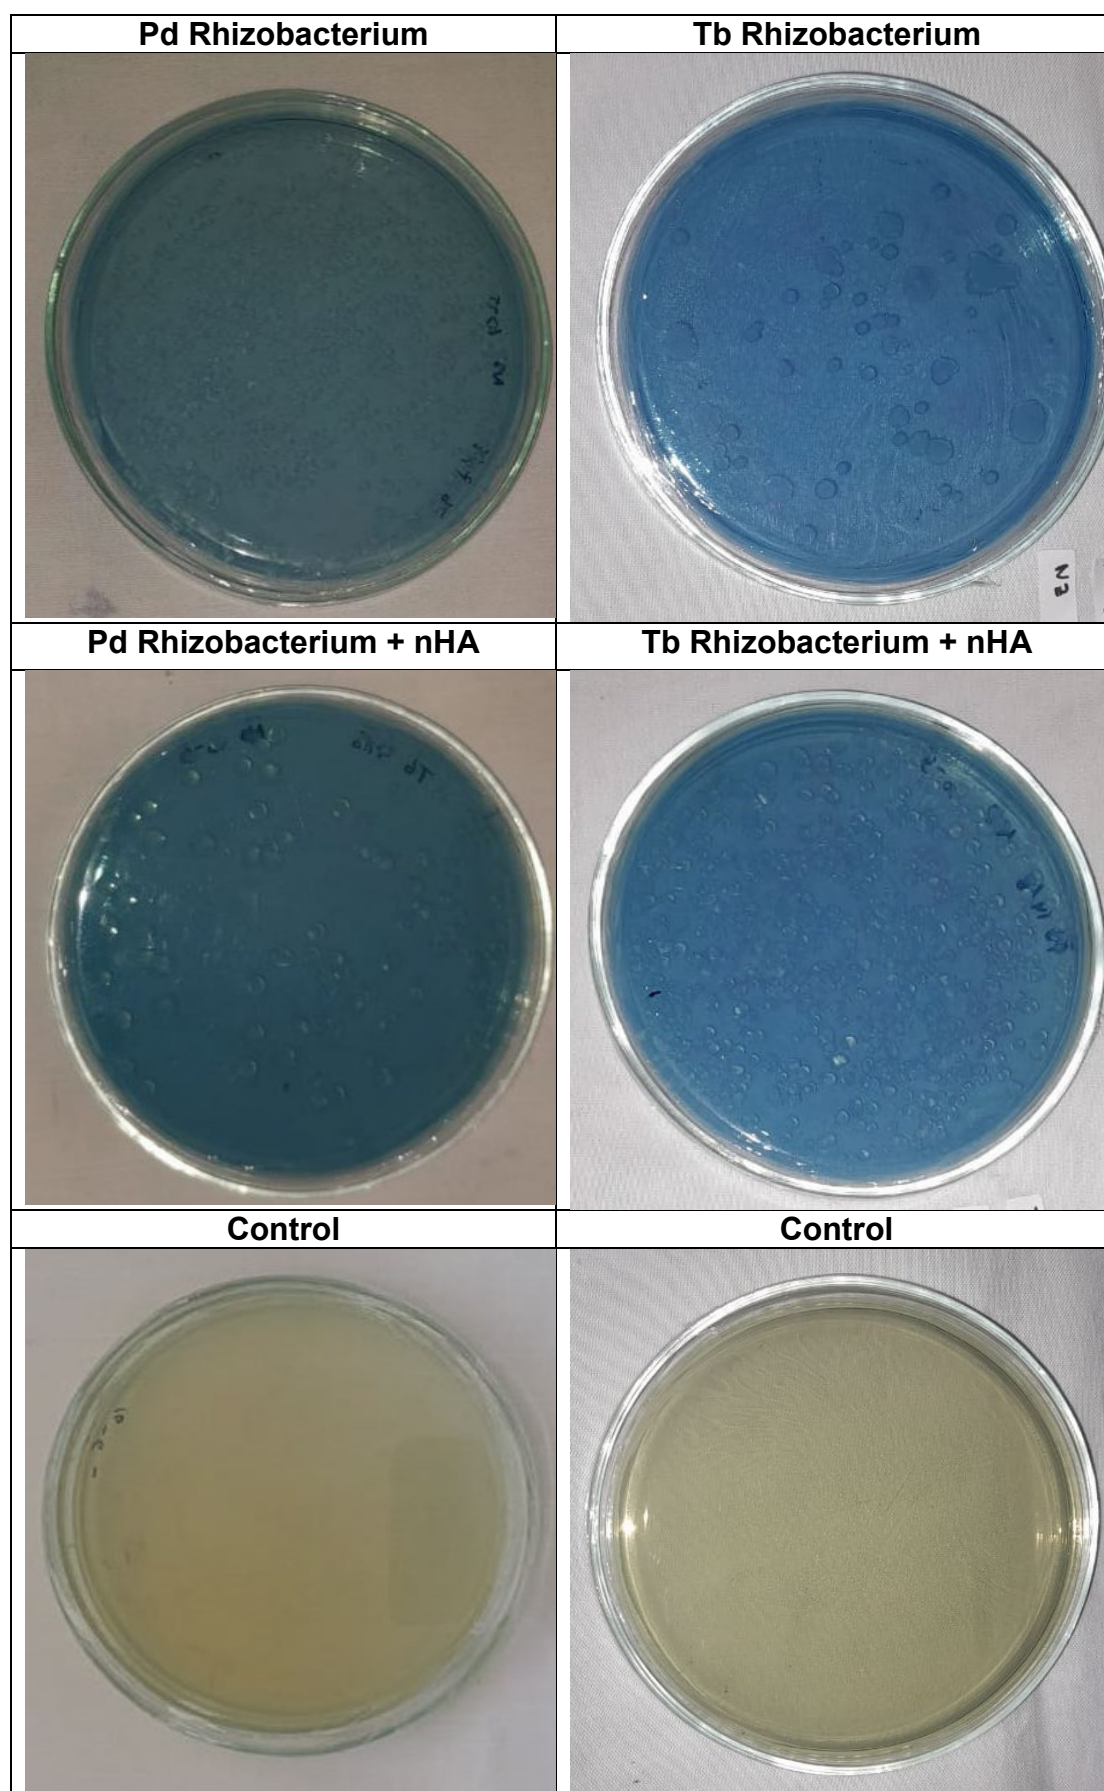

**Figure S1:** Nitrogen-fixation test of Pd and Tb rhizobacteria.

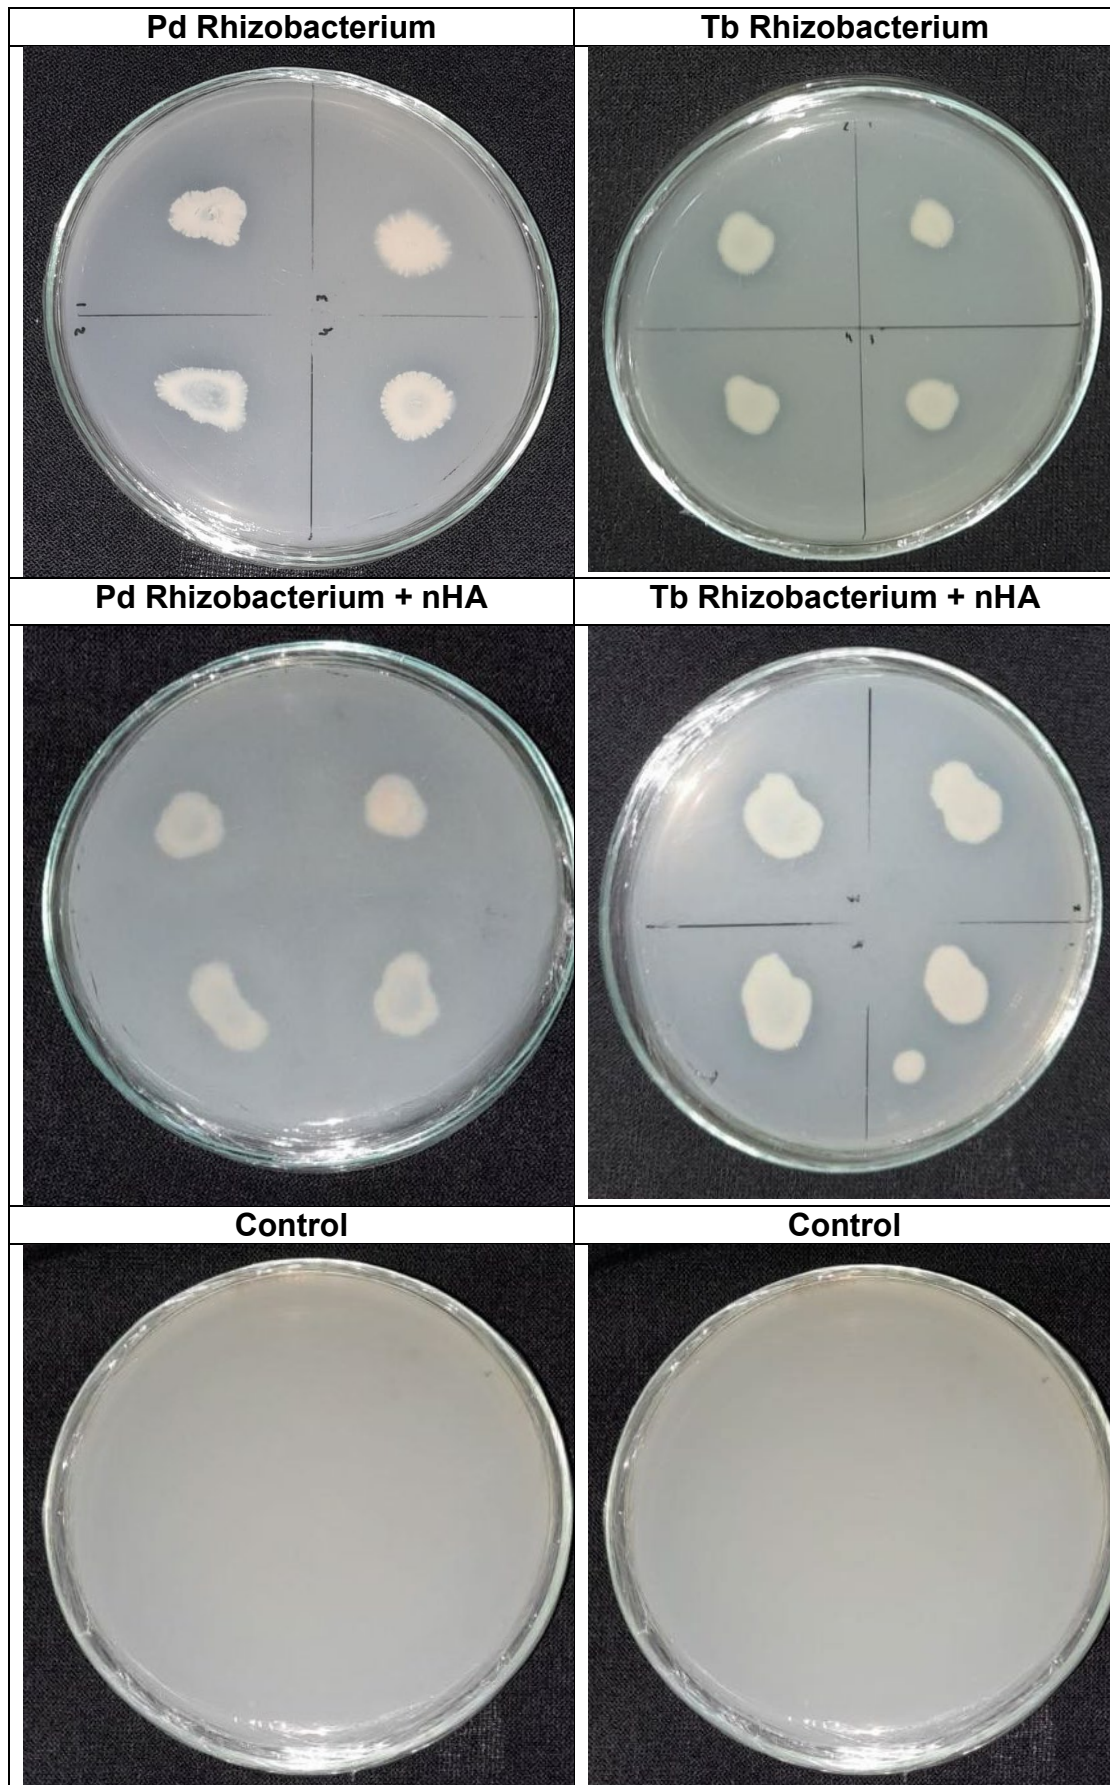

**Figure S2:** Phosphate-solubilizing test of Pd and Tb rhizobacteria.
